# Supplementary material for: Bilayer hexagonal structure MnN2 nanosheets with room-temperature ferromagnetic half-metal behavior and a tunable electronic structure
Source: Royal Society of Chemistry journal article supplement (doi:10.1039/d3cp01588b), 2023-01-01
Supplement: d3cp01588b1.pdf [file d3cp01588b1.pdf]

## Supplementary Information

### **Bilayer hexagonal structure MnN<sub>2</sub> nanosheet with room-temperature ferromagnetic half-metal behavior and tunable electronic structure**

Yuan Gao, Honggang Pan,\* Baozeng Zhou\*

Tianjin Key Laboratory of Film Electronic & Communicate Devices, School of Integrated Circuit Science and Engineering, Tianjin University of Technology, Tianjin 300384, China

\*Corresponding Authors

[phg022@163.com](mailto:phg022@163.com) (H. Pan)

[baozeng@tju.edu.cn](mailto:baozeng@tju.edu.cn) (B. Zhou)

**Table S1.** Elastic constants of BHS-MnN<sub>2</sub>, BHS-MnP<sub>2</sub> and BHS-MnAs<sub>2</sub>.

|                         | Elastic Constants (N/m) |          |          |          |                   | Young's Modulus (N/m) | Shear Modulus (N/m) | Poisson's Ratio |
|-------------------------|-------------------------|----------|----------|----------|-------------------|-----------------------|---------------------|-----------------|
|                         | $C_{11}$                | $C_{22}$ | $C_{12}$ | $C_{66}$ | $C_{11}- C_{12} $ | $x$ or $y$            |                     | $x$ or $y$      |
| <b>MnN<sub>2</sub></b>  | 190.28                  | 190.28   | 64.37    | 62.96    | $>0$              | 168.51                | 62.96               | 0.34            |
| <b>MnP<sub>2</sub></b>  | 102.62                  | 102.62   | 31.16    | 35.73    | $>0$              | 93.15                 | 35.73               | 0.30            |
| <b>MnAs<sub>2</sub></b> | 87.21                   | 87.21    | 17.82    | 34.69    | $>0$              | 83.56                 | 34.69               | 0.20            |

**Table S2.** Energy difference between antiferromagnetic and ferromagnetic states of MnN<sub>2</sub>, MnP<sub>2</sub> and MnAs<sub>2</sub>.

| System            | $\Delta E_{\text{FM}}(\text{eV})$ | $\Delta E_{\text{AFM1}}(\text{eV})$ | $\Delta E_{\text{AFM2}}(\text{eV})$ | $\Delta E_{\text{AFM3}}(\text{eV})$ | $\Delta E_{\text{AFM4}}(\text{eV})$ | $\Delta E_{\text{AFM5}}(\text{eV})$ |
|-------------------|-----------------------------------|-------------------------------------|-------------------------------------|-------------------------------------|-------------------------------------|-------------------------------------|
| MnN <sub>2</sub>  | 0                                 | 8.12                                | 6.71                                | 4.68                                | 6.24                                | 6.34                                |
| MnP <sub>2</sub>  | 0                                 | 3.65                                | 3.30                                | 2.07                                | 2.91                                | 2.58                                |
| MnAs <sub>2</sub> | 0                                 | 6.13                                | 4.48                                | 2.62                                | 4.47                                | 4.07                                |

**Table S3.** Localized magnetic moment ( $M$ ,  $\mu_B$ ), exchange parameters  $J_1$  and  $J_2$ , magnetic anisotropic energy and calculated Curie temperature of BHS-MnN<sub>2</sub>, BHS-MnP<sub>2</sub> and BHS-MnAs<sub>2</sub>.

| Substance             | $M_{\text{Mn}}(\mu_B)$ | $M_{\text{N, P, As}}(\mu_B)$ | $M_{\text{Tot}}(\mu_B)$ | $J_1(\text{eV})$ | $J_2(\text{eV})$ | $E_{\text{MAE}}(\mu\text{eV})$ | $T_C(\text{K})$ |
|-----------------------|------------------------|------------------------------|-------------------------|------------------|------------------|--------------------------------|-----------------|
| BHS-MnN <sub>2</sub>  | 2.43                   | -0.55                        | 5.23                    | 0.169            | 0.419            | 3.67                           | 563             |
| BHS-MnP <sub>2</sub>  | 2.84                   | -0.38                        | 8.28                    | 0.076            | 0.206            | 8.27                           | 705             |
| BHS-MnAs <sub>2</sub> | 3.37                   | -0.42                        | 10.19                   | 0.088            | 0.194            | 41.58                          | 1122            |

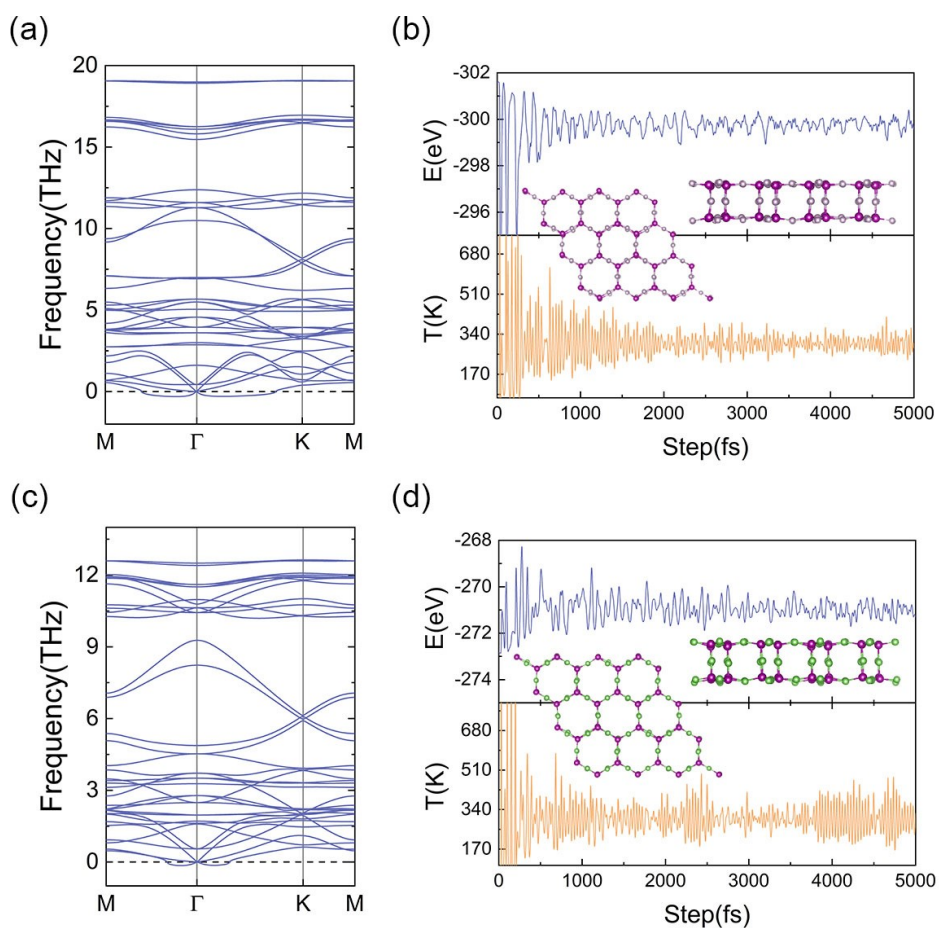

**Fig. S1** (a) Phonon dispersions of MnP<sub>2</sub> nanosheet, (b) The fluctuations of energy and temperature as well as the final configuration of MnP<sub>2</sub> are obtained from AIMD simulation, (c) Phonon dispersions of MnAs<sub>2</sub> nanosheet, (d) The fluctuations of energy and temperature as well as the final configuration of MnAs<sub>2</sub> are obtained from AIMD simulation.

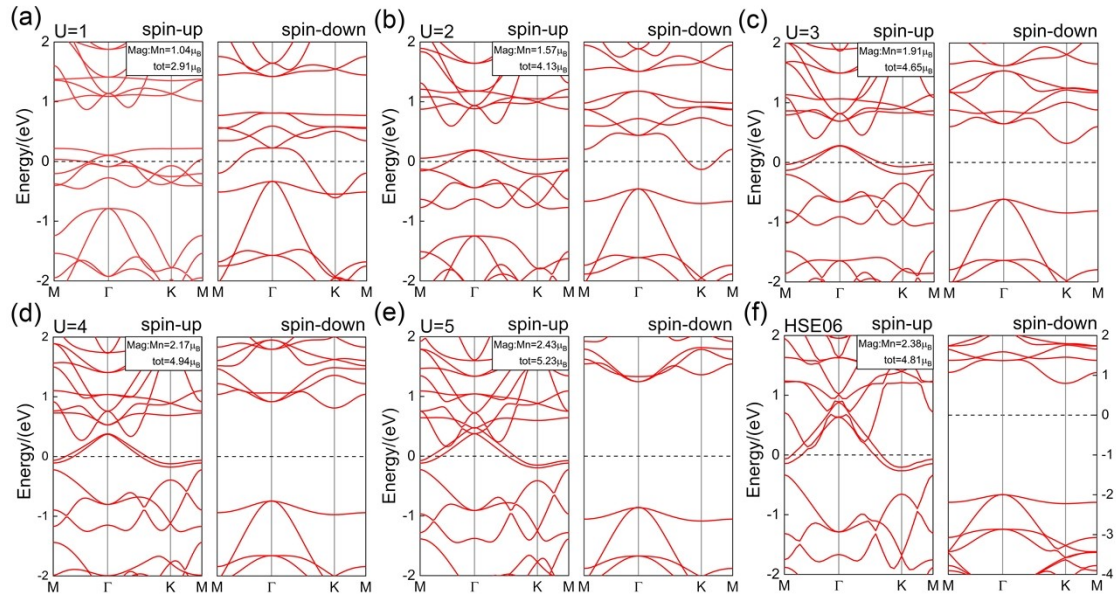

**Fig. S2** (a)-(e) Band structures of BHS-MnN<sub>2</sub> nanosheet calculated by PBE+U (U<sub>eff</sub>=1, 2, 3, 4, 5), and (f) Band structure of BHS-MnN<sub>2</sub> calculated by HSE method.

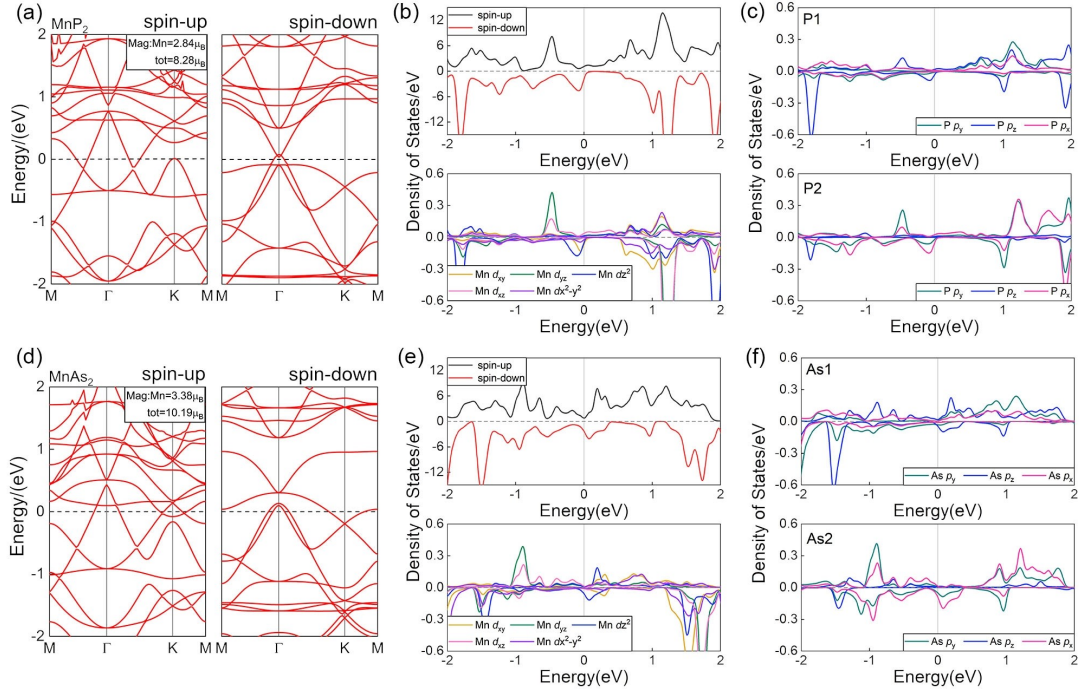

**Fig. S3** (a) BHS-MnP<sub>2</sub> spin polarization band structure. (b) Calculate the total DOS of BHS-MnP<sub>2</sub> and the *d*-orbital projection DOS of Mn with  $U_{\text{eff}}=5$  eV. (c) *p*-orbital projection DOS for different coordination P. (d) BHS-MnAs<sub>2</sub> polarization band structure. (e) Calculate total DOS for BHS-MnAs<sub>2</sub> and *d*-orbital projection DOS for Mn with  $U_{\text{eff}}=5$  eV. (f) *p*-orbital projection DOS for different coordination As.

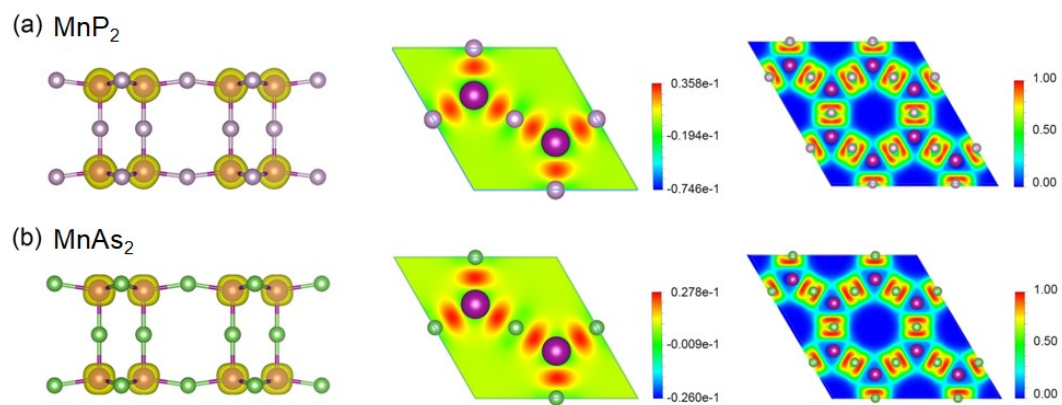

**Fig. S4** (a) The spin density distribution, deformed charge density and ELF of BHS-MnP<sub>2</sub>. (b) The spin density distribution, deformed charge density and ELF of BHS-MnAs<sub>2</sub>.



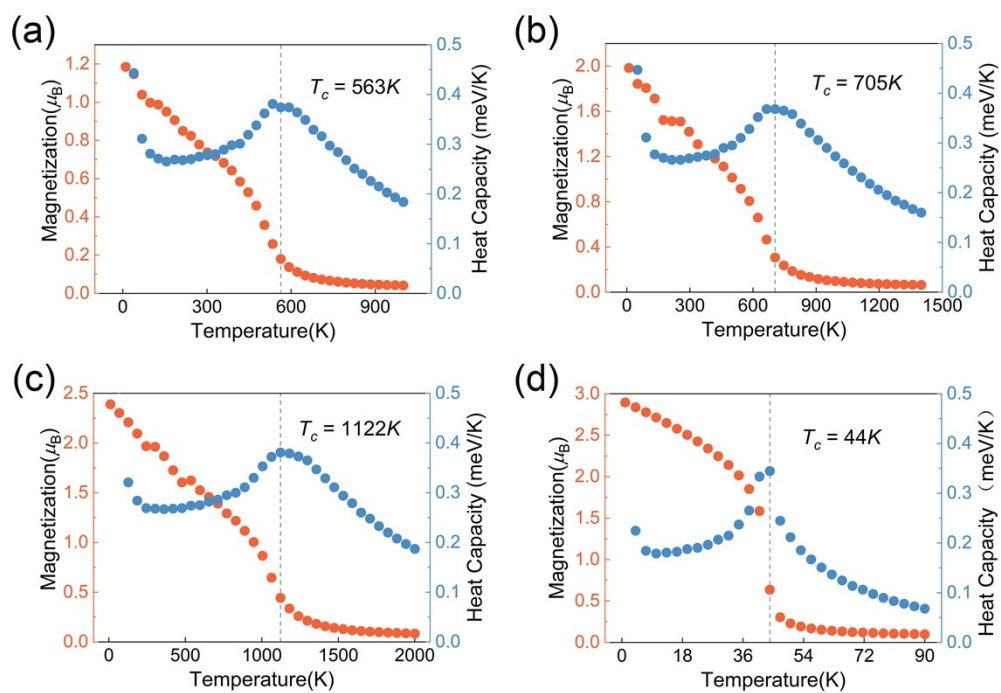

**Fig. S5** Magnetic moment per unit cell (red) and specific heat ( $C_v$ ) (blue) of (a) BHS-MnN<sub>2</sub>, (b) BHS-MnP<sub>2</sub>, (c) BHS-MnAs<sub>2</sub>, (d) CrI<sub>3</sub>.

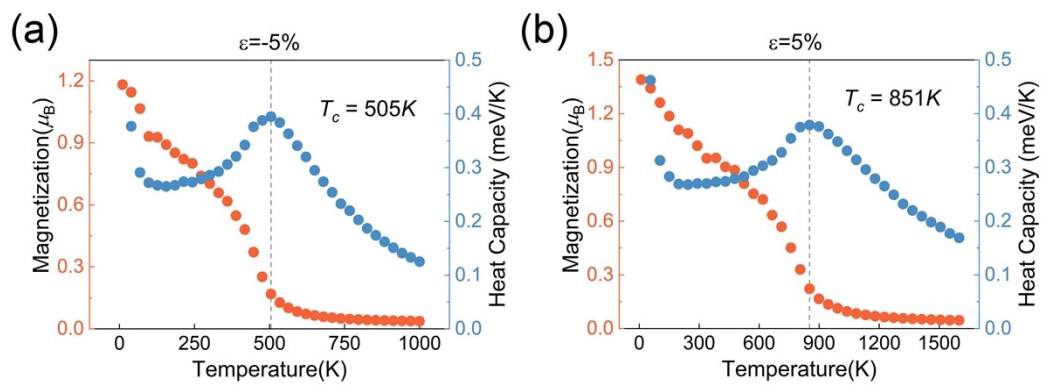

**Fig. S6** Variations of magnetic moment and heat capacity of MnN<sub>2</sub> with temperature under (a) 5% and (b) -5% strain.
